# Supplementary material for: Phenotypic diversity and hybridization of wild Saccharomyces for improving bioethanol production
Source: Research Square preprint supplement (doi:10.21203/rs.3.rs-8138800/v1), 2026-01-05
Supplement: Supplementary file 1 [file 2c296ed6dc717233063eb1de.xlsx]

## Sheet: S2a
Table S2a. Kinetic parameter (µmax) of S. eubayanus hybrids in different carbon sources
Strain	Fructose	Galactose	Glycerol	Lactose	Malt extract	Maltodextrin	Maltose	Sucrose	Xilose
H10-YPD	0.945704	0.700716	0.578131	0.594481	0.396072	0.494186	0.576776	1.00074	0.558137
H13-YPD	0.918629	0.775768	0.547321	0.572884	0.337396	0.447066	0.709897	0.920657	0.52493
H16-YPD	0.991343	0.829219	0.633837	0.798129	0.464864	0.319139	0.801447	1.0011	0.697198
H17-YPD	0.997371	0.799142	0.500173	0.699464	0.246261	0.518606	0.519576	0.892315	0.517425
H18-YPD	0.703233	0.45613	0.640175	0.23148	0.14037	0.337949	0.539816	0.689977	0.456674
H2-YPD	0.924214	0.786038	0.522922	0.576127	0.425757	0.415962	0.705695	0.944706	0.568926
H20-YPD	0.935819	0.760572	0.718561	0.502222	0.271022	0.409038	0.760416	0.863622	0.546259
H21-YPD	0.891283	0.708352	0.578344	0.461364	0.257934	0.349304	0.654744	0.786383	0.437706
H22-YPD	0.90896	0.680294	0.58045	0.592781	0.367654	0.425806	0.531091	0.850944	0.466469
H26-YPD	0.948836	0.636151	0.614337	0.519525	0.294806	0.429813	0.685117	0.947622	0.446518
H3-YPD	0.946086	0.770965	0.570823	0.601507	0.402807	0.384503	0.698256	0.986061	0.582493
H30-YPD	0.92686	0.720226	0.582457	0.465485	0.402445	0.489455	0.650241	0.979125	0.526849
H5-YPD	0.991405	0.724922	0.602238	0.541156	0.455269	0.50644	0.690957	0.955826	0.570875
H7-YPD	0.947686	0.75213	0.609795	0.598391	0.513671	0.421904	0.689266	0.965681	0.568838
H8-YPD	0.936325	0.708784	0.484693	0.620642	0.340453	0.388631	0.735199	0.992338	0.561314
H1-SMB	1.00654	0.767774	0.628146	0.666727	0.325865	0.480141	0.69727	0.983663	1.36929
H10-SMB	0.93779	0.765239	0.613989	0.437394	0.248261	0.448542	0.731312	0.795842	0.481367
H11-SMB	0.955599	0.748994	0.701242	0.52856	0.290054	0.494685	0.726922	0.823604	0.519593
H12-SMB	1.01952	0.93074	0.632409	0.398922	0.309789	0.518892	0.676632	0.963782	0.478874
H13-SMB	0.973842	0.863769	0.324992	0.2347	0.379559	1.5401	0.486368	0.810414	0.260443
H14-SMB	0.930217	0.798708	0.569698	0.713887	0.317637	0.466293	0.688545	1.01437	0.646678
H17-SMB	0.939877	0.791175	0.761758	0.582304	0.493606	0.47204	0.71662	0.896532	0.636974
H18-SMB	0.98702	0.800943	0.778618	0.72275	0.350239	0.526431	0.926495	1.04078	0.657486
H2-SMB	0.933419	0.718556	0.572917	0.625946	0.365799	0.368873	0.754145	0.963871	0.617816
H23-SMB	0.966478	0.719251	0.644727	0.543809	0.28189	0.616881	0.735597	0.923891	0.548832
H26-SMB	0.965228	0.747439	0.673882	0.614074	0.294477	0.501053	0.769863	0.982473	0.583792
H28-SMB	0.96541	0.691431	0.654095	0.624146	0.301754	0.546629	0.739682	0.970594	0.596026
H3-SMB	1.0043	0.726298	0.572865	0.531707	0.451249	0.518261	0.537533	1.01511	0.559227
H30-SMB	0.743572	0.626346	0.195231	0.627501	0.200749	0.965661	0.511844	2.46108	0.524359
H7-SMB	0.937409	0.958718	0.308402	0.69989	0.356021	1.2666	0.444918	0.899248	0.276296
H9-SMB	0.901584	0.72189	0.577772	0.516757	0.273451	0.448481	0.665357	0.779343	0.466983
W34/70	0.54264	0.947998	0.809459	0.286337	0.157427	0.509605	0.471164	0.618583	0.523586

## Sheet: S2b
Table S2b. Kinetic parameter (µmax) of S. eubayanus hybrids in stressor media
Strain	Caffeine	CuSO4	DTT	G418	H2O2	KCl	SDS	Sorbitol
H10-YPD	0.643715	0.872934	0.791316	0.47201	0.897046	0.989567	1.00326	0.519643
H13-YPD	0.74083	0.904893	0.808576	0.565634	0.595519	1.01996	0.968957	0.462377
H16-YPD	0.619579	1.00507	0.802714	0.530534	1.06117	0.963948	1.02561	0.586866
H17-YPD	0.535227	1.13264	0.795599	0.683187	0.8844	1.01369	0.980539	0.60684
H18-YPD	0.542834	0.338416	0.650271	0.487063	0.131209	0.583404	0.321353	0.23327
H2-YPD	0.633981	0.941347	0.813839	0.389259	0.805869	0.9442	0.953226	0.44557
H20-YPD	0.641859	0.901726	0.756638	1.96493	0.440074	0.922078	0.811697	0.311493
H21-YPD	0.622942	0.947862	0.825587	0.63814	0.869199	0.941793	0.779401	0.382617
H22-YPD	0.554221	0.819936	0.783096	1.11918	0.876968	0.968411	0.768174	0.431004
H26-YPD	0.642206	0.876327	0.810165	0.197801	0.572966	0.932104	0.909181	0.503598
H3-YPD	0.54465	0.926022	0.820437	0.442871	0.910491	0.949908	0.947969	0.527257
H30-YPD	0.632075	0.89592	0.830828	0.273588	1.35512	0.940614	0.94748	0.474299
H5-YPD	0.604134	0.897133	0.814306	0.504731	0.884371	0.926193	0.950148	0.544059
H7-YPD	0.674003	0.94174	0.796979	0.553599	0.743719	0.954708	0.939202	0.490055
H8-YPD	0.640921	0.973248	0.823483	0.414456	0.885932	0.943918	0.974046	0.489229
H1-SMB	0.63448	0.936223	0.856405	1.68278	0.896908	1.04181	1.03121	0.57767
H10-SMB	0.604864	0.842908	0.77422	1.01657	0.797902	0.833372	0.960699	0.244534
H11-SMB	0.684108	0.936309	0.839604	0.304723	0.764095	0.935979	0.870621	0.40033
H12-SMB	0.645763	0.873865	0.813604	0.166713	0.964993	0.833221	0.839032	0.32734
H13-SMB	0.786449	0.828551	0.863046	0.407211	0.911982	0.844935	0.909448	0.501354
H14-SMB	0.675992	0.941994	0.945445	0.473717	0.86094	0.981204	1.09544	0.547475
H17-SMB	0.597286	0.901158	0.753491	0.51835	0.865231	0.982077	0.981321	0.564942
H18-SMB	0.499598	1.29628	0.706533	0.989172	0.769081	0.943098	0.997033	0.589966
H2-SMB	0.619459	0.927504	0.81305	0.421569	0.895833	0.998226	0.972889	0.320029
H23-SMB	0.548838	0.937136	0.865253	0.567037	0.794405	0.846393	0.879474	0.417849
H26-SMB	0.641522	1.01216	0.843362	0.46093	0.776808	1.00719	1.00552	0.47045
H28-SMB	0.619365	0.897343	0.685992	0.448863	0.870409	0.820072	0.976105	0.436077
H3-SMB	0.556945	0.823051	0.809557	0.328194	0.877177	0.957331	0.941989	0.515823
H30-SMB	0.542656	0.707354	0.566651	0.744754	1.68187	0.442867	0.9329	0.466787
H7-SMB	0.811415	0.91981	0.874343	0.73185	0.933861	0.919651	0.946528	0.60823
H9-SMB	0.569717	0.923465	0.720919	0.501332	0.893426	0.910473	0.880952	0.415259
W34/70	0.233694	0.457959	0.932769	0.701533	1.27115	0.589866	0.586045	0.260113

## Sheet: S2c
Table S2b. Fermentative performance of S. eubayanus hybrids in SMB
Strain	R1	R2	R3	Mean CO2 loss	SD CO2 loss	Increasing compared to best parental (%)*
H2-YPD	23.5	25.5	25	24.6667	1.04083	23.3333
H3-YPD	17.75	22	19.5	19.75	2.136	-1.25
H5-YPD	23	14.25	16.75	18	4.50694	-10
H7-YPD	17.5	17	18	17.5	0.5	-12.5
H8-YPD	15.75	26.5	18	20.0833	5.66973	0.416667
H10-YPD	17.25	20.5	26.25	21.3333	4.5575	6.66667
H13-YPD	9	8.75	9.75	9.16667	0.520416	-54.1667
H16-YPD	21.25	15	19	18.4167	3.16557	-7.91667
H17-YPD	30.5	14.75	25.5	23.5833	8.04803	17.9167
H18-YPD	17	24.25	29.5	23.5833	6.27661	17.9167
H20-YPD	25.5	14.5	19.75	19.9167	5.50189	-0.416667
H21-YPD	16.75	18.25	27.5	20.8333	5.82201	4.16667
H22-YPD	25.25	17.75	19	20.6667	4.01819	3.33333
H26-YPD	17.5	16.75	16.25	16.8333	0.629153	-15.8333
H30-YPD	26.25	18.25	12	18.8333	7.14289	-5.83333
H1-SMB	18	15.75	12.25	15.3333	2.89756	-23.3333
H3-SMB	15.5	23	19.25	19.25	3.75	-3.75
H7-SMB	20.75	14.75	27.75	21.0833	6.50641	5.41667
H9-SMB	21	17.5	14.5	17.6667	3.2532	-11.6667
H10-SMB	20.25	15.5	22.75	19.5	3.68273	-2.5
H11-SMB	18.75	15.75	17.75	17.4167	1.52753	-12.9167
H12-SMB	21.75	20.5	26	22.75	2.88314	13.75
H13-SMB	21.25	19.75	17	19.3333	2.15542	-3.33333
H14-SMB	22	22.25	16	20.0833	3.53848	0.416667
H17-SMB	18.25	18.25	14.25	16.9167	2.3094	-15.4167
H18-SMB	18	22.75	22.5	21.0833	2.67317	5.41667
H23-SMB	20.75	23.5	28.5	24.25	3.92906	21.25
H26-SMB	16.25	22	30.5	22.9167	7.16909	14.5833
H28-SMB	24.75	19	17.5	20.4167	3.82699	2.08333
H30-SMB	26.25	24	26.5	25.5833	1.37689	27.9167
*Comparison with CL824.1 fermentative capacity (20 CO2 g/L)
