# Supplementary material for: Phenotypic diversity and hybridization of wild Saccharomyces for improving bioethanol production
Source: Research Square preprint supplement (doi:10.21203/rs.3.rs-8138800/v1), 2026-01-05
Supplement: Supplementary file 1 [file 145cd6c02aac018ea48b3220.pdf]

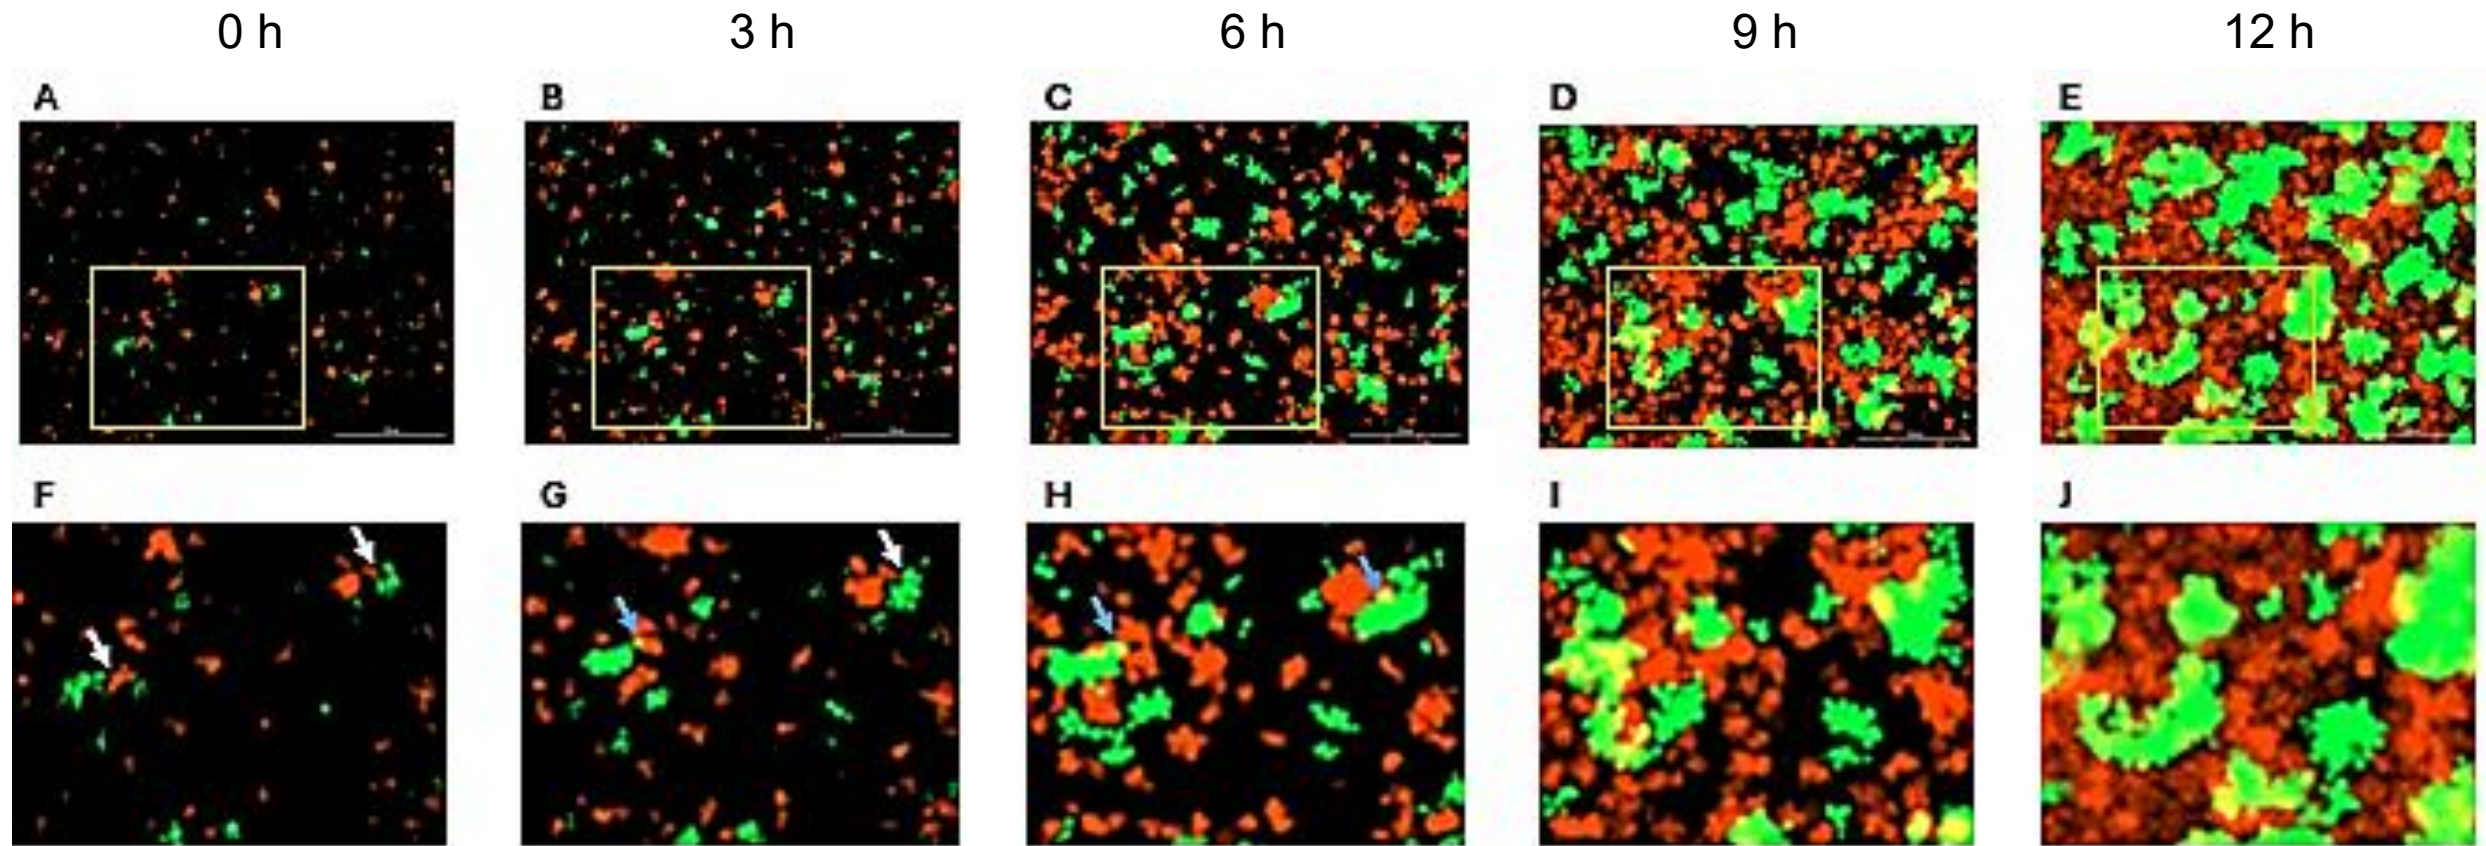

**Figure S3. Kinetics of the mating process by fluorescence microscopy.** CL444 ( $\alpha$ ) was labeled with GFP, and CL444 ( $a$ ) was labeled with mCherry. Images were acquired every 3 hours using the Cytation 3 system. Panels (A), (B), (C), (D), and (E) correspond to images obtained at 0, 3, 6, 9, and 12 hours, respectively, from the initial step of mating assay. Panels (F), (G), (H), (I), and (J) correspond to the highlighted fields in (A), (B), (C), (D), and (E). White arrows indicate points of contact between spores of different mating types, while blue arrowheads highlight some examples of colocalization (yellow signals), which indicate effective hybrid formation .
