# Supplementary material for: Phenotypic diversity and hybridization of wild Saccharomyces for improving bioethanol production
Source: Research Square preprint supplement (doi:10.21203/rs.3.rs-8138800/v1), 2026-01-05
Supplement: Supplementary file 2 [file 1ea1829808bac9eeac9ace31.pdf]

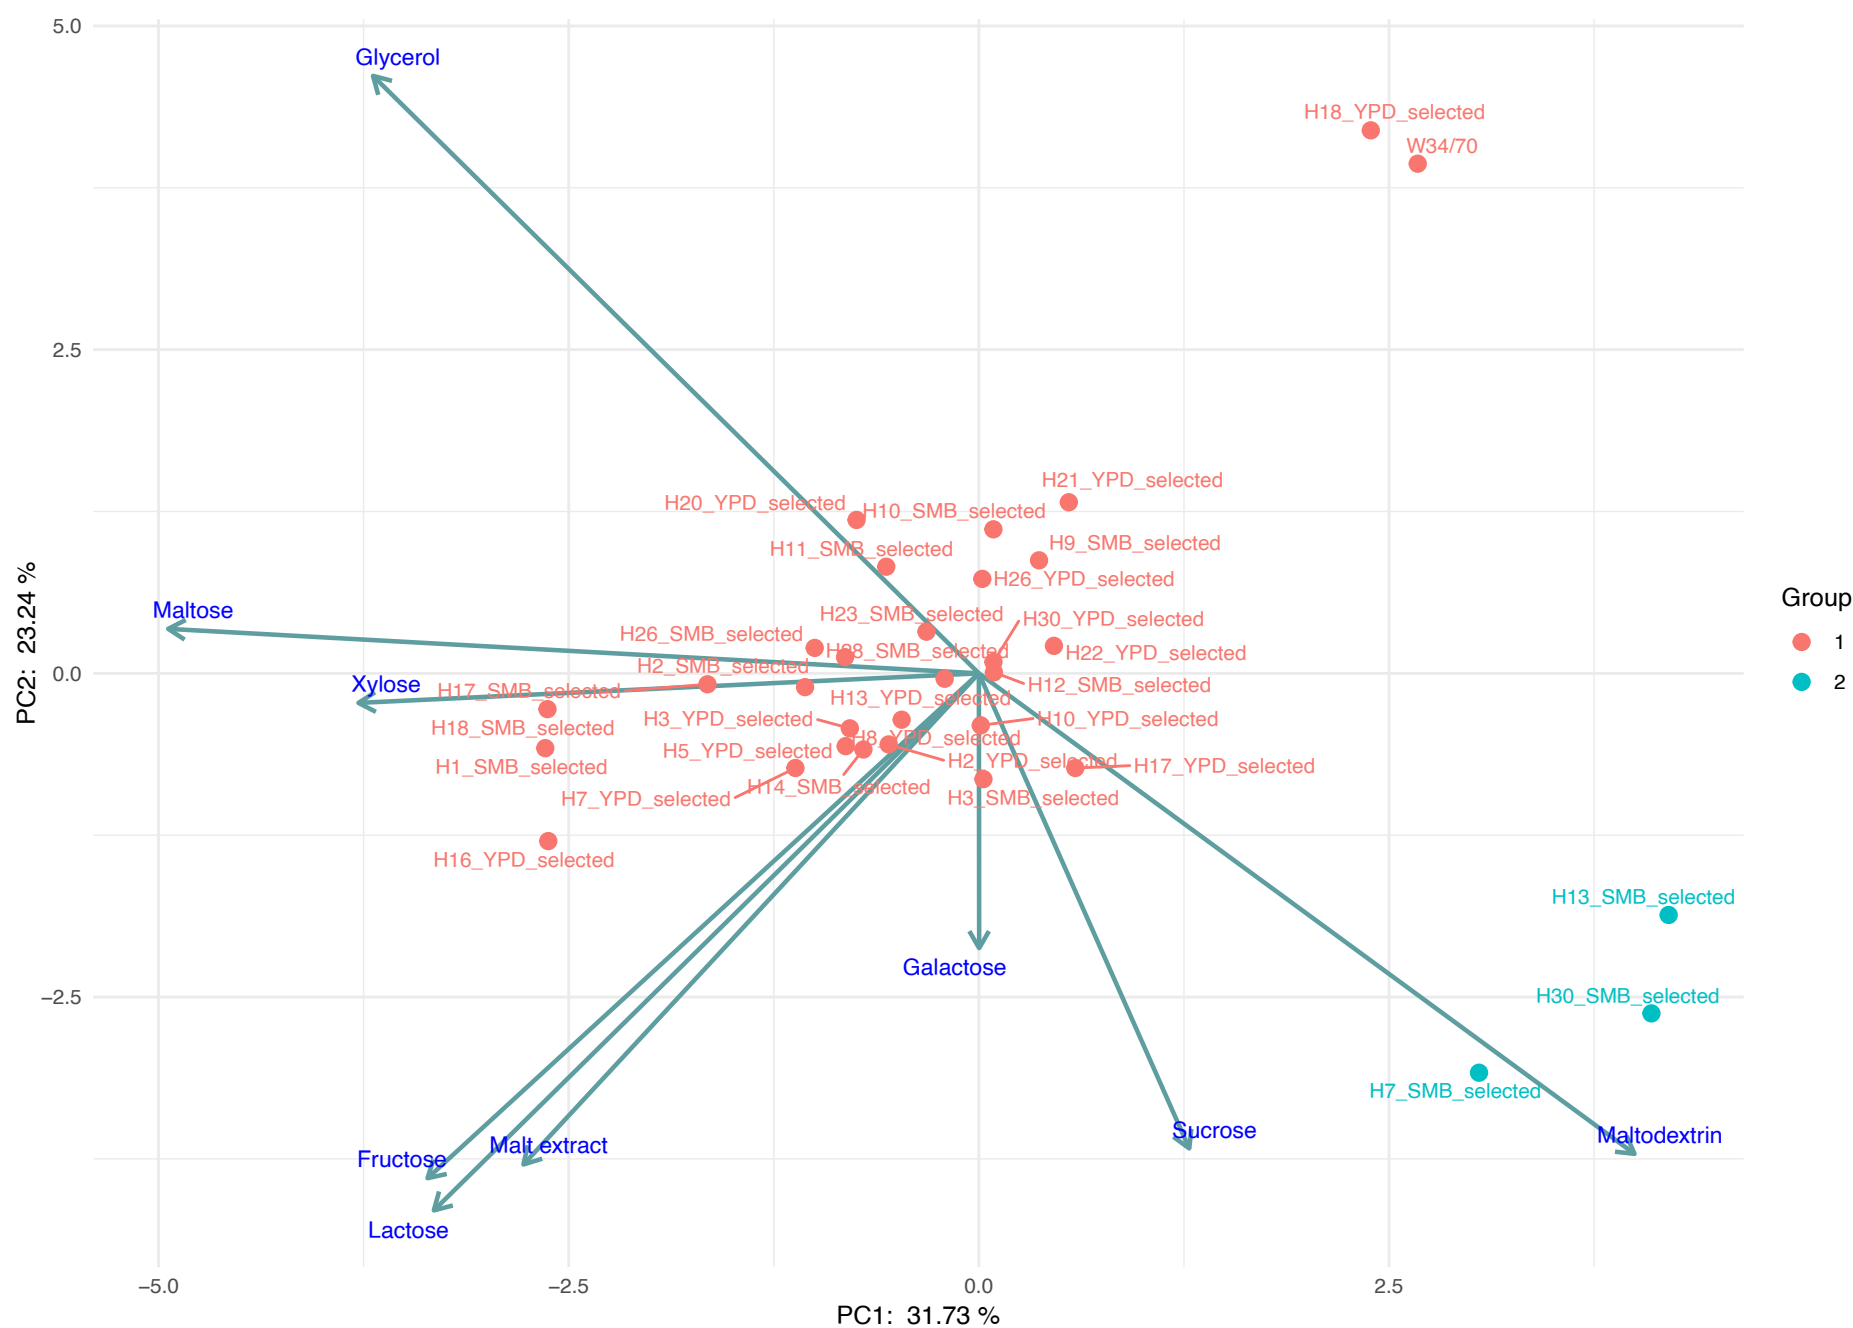

Figure S4. **PCA analysis of the growth rate of hybrids on different carbon sources.** The strains were cultured in YNB medium supplemented with respective carbon sources, and the OD600 was measured over time. A PCA analysis was performed, and the estimated optimal group number was determined by fviz\_nbclust.
