# Supplementary material for: Phenotypic diversity and hybridization of wild Saccharomyces for improving bioethanol production
Source: Research Square preprint supplement (doi:10.21203/rs.3.rs-8138800/v1), 2026-01-05
Supplement: Supplementary file 2 [file 8ac4d989491111b0dfef285b.xlsx]

## Sheet: Table S1a
Table S1a. Composition and nutrient concentration of SMB.
Category	Nutrient	Concentration (g/L)
Carbon sources	Sucrose	144
	Glucose	18
	Fructose	18
Nitrogen sources	Peptone	4.9
	(NH4)2SO4	0.1
	(NH4)2HPO4·4H2O	1.42
Organic acids	Trans-aconitic acid	2
	l-malic acid	1
	Citric acid	0.01
Mineral salts	NaCl	0.5
	MgSO4·7H2O	1002
	CaCl2·2H2O	0.06712
	KCl	0.012
	MnSO4·H2O	0.0004
	ZnSO4·7H2O	0.0004
	FeCl3·6H2O	0.017
	Na2MoO4·H2O	0.031
	KI	0.012
	CuSO4·5H2O	0.0004
	H3BO3	0.0005
Vitamins	Inositol	0.01
	Nicotinic acid	0.01
	Calcium pantothenate	0.001
	Biotin	0.00001
	Pyridoxine hydrochloride	0.00004
	Thiamine hydrochloride	0.00004
	Para-aminobenzoic acid	0.002
	Ergosterol	2 mL*
*6%, w v−1, ergosterol in ethanol solution

## Sheet: Table S1b
Table S1b. Sporulation of S. eubayauns strains
Strain	Sporulation
CL915.1	0.93
CL710.1	0.9
CL813.1	0.9
CL1112.1	0.9
CL910.1	0.89
CL1104.1	0.89
CL1109.1	0.89
CL810.1	0.87
CL1002.1	0.87
CL815.1	0.85
CL444.2	0.84
CL824.1	0.83
CL1003.1	0.82
CL1111.1	0.82
CL1004.1	0.81
CL1007.1	0.8
CL1108.1	0.8
CL1101.1	0.8
CL1010.1	0.79
CL704.2	0.79
CL1001.1	0.77
CL619.1	0.76
CL446.2	0.75
CL803.1	0.75
CL701.1	0.74
CL804.1	0.74
CL620.1	0.73
CL702.1	0.73
CL1008.1	0.73
CL703.2	0.72
CL816.1	0.72
CL1110.1	0.7
CL711.2	0.7
CL605.1	0.7
CL1009.1	0.7
CL906.1	0.69
CL467.2	0.68
CL706.2	0.68
CL715.1	0.68
CL807.1	0.67
CL821.1	0.67
CL607.1	0.66
CL606.1	0.66
CL817.1	0.65
CL812.1	0.65
CL903.1	0.65
CL1106.1	0.64
CL220.3	0.64
CL451.4	0.63
CL610.1	0.62
CL1005.1	0.62
CL905.1	0.62
CL448.1	0.61
CL902.1	0.61
CL909.1	0.6
CL204.3	0.6
CL215.1	0.6
CL621.1	0.58
CL471.2	0.58
CL604.1	0.58
CL611.1	0.58
CL907.1	0.58
CL608.1	0.57
CL447.3	0.57
CL1006.1	0.57
CL916.1	0.56
CL904.1	0.55
CL221.1	0.55
CL705.1	0.54
CL218.1	0.54
CL609.1	0.52
CL801.1	0.51
CL601.1	0.5
CL450.1	0.5
CL210.1	0.5
CL449.1	0.49
CL814.1	0.48
CL211.3	0.47

## Sheet: Table S1c
Table S1c. Kinetic parameter (µmax) of S. eubayauns in different carbon sources
Strain	Malt extract	Fructose	Galactose	Glycerol	Lactose	Maltodextrin	Maltose	Raffinose	Sucrose	Sorbitol	Xylose	SMB
CL1001.1	1.18595	1.23658	0.512678	0.0818111	0.190783	0.242764	0.39125	0.413074	0.557138	0.463359	0.14209	0.555552
CL1002.1	1.12615	0.219267	0.150299	0.0138498	0.050263	0.41336	1.0944	1.60039	1.7968	0.179336	0.0292301	0.197879
CL1003.1	1.25865	0.208509	0.126937	0.0714289	0.0539654	0.548386	1.33735	1.59163	1.96872	0.136591	0.0264603	0.148304
CL1004.1	1.34215	1.26766	0.268955	0.0578948	0.150926	0.123416	0.335129	0.685581	0.830096	0.626468	0.366284	0.293759
CL1005.1	1.28057	0.223693	0.180918	0.0204867	0.05888	0.337757	0.951047	1.02651	1.32513	0.263962	0.022092	0.197663
CL1006.1	1.08091	0.21722	0.16815	0.0661029	0.110065	0.383497	1.02655	1.76698	1.47509	0.193975	0.0579982	0.213986
CL1007.1	1.08252	1.24154	0.287197	0.031478	0.148421	0.0939509	0.524772	1.22317	1.65214	1.39236	0.314448	0.193427
CL1008.1	1.20253	0.267511	0.214212	0.0806723	0.0773268	0.256419	0.765921	1.15862	1.18673	0.295866	0.0869782	0.330165
CL1009.1	1.28933	0.222162	0.179024	0.0558844	0.100121	0.372243	0.800053	1.17421	1.39883	0.246757	0.0901244	0.279966
CL1010.1	1.22748	1.12911	0.519341	0.205219	0.33499	0.347752	0.256307	0.335491	0.418265	0.394495	0.0409418	0.530954
CL1101.1	0.979537	0.337013	0.291155	0.0718135	0.078733	0.524333	0.689462	0.759953	0.949155	0.346267	0.043226	0.261278
CL1104.1	0.612848	0.384088	0.275607	0.0511109	0.0440418	0.620855	0.724906	0.807868	0.972455	0.30438	0.0334291	0.231697
CL1106.1	0.642354	1.54288	0.319056	0.0647874	0.100351	0.434285	0.575462	0.628668	0.756053	0.67954	0.228964	0.352945
CL1108.1	0.492404	0.450504	0.39339	0.054752	0.0897564	0.715528	0.485417	0.540078	0.672395	0.476154	0.139257	0.429931
CL1109.1	0.545167	0.47288	0.376375	0.0952771	0.0847548	1.1892	0.560078	0.553974	0.727275	0.424519	0.0578628	0.369264
CL1110.1	0.717458	1.63444	0.311273	0.058562	0.0660278	0.664021	0.493285	0.585869	0.736103	0.650161	0.190641	0.367675
CL1111.1	0.571782	0.407902	0.286487	0.063904	0.0768766	0.576057	0.720211	0.781965	0.884179	0.346215	0.0444449	0.274102
CL1112.1	0.760947	0.276267	0.221076	0.0776221	0.0727298	1.19109	0.940296	0.850823	1.20594	0.289911	0.0375153	0.229998
CL204.3	0.67002	1.23215	0.207154	0.0453394	0.0541365	0.0651552	0.718701	0.914048	1.08478	0.51805	0.368935	0.266651
CL210.1	0.275381	0.293287	0.195429	0.0483442	0.0709471	0.237799	0.876127	0.965538	1.27012	0.152981	0.0569844	0.257714
CL211.3	0.243369	0.302929	0.20226	0.0498917	0.0412593	0.233609	0.881335	1.01813	1.23235	0.153456	0.0679244	0.260981
CL215.1	0.280063	1.09945	0.253647	0.0587268	0.0515684	0.0584215	1.29744	1.44607	1.80464	1.06417	0.627883	0.175379
CL216.1	0.272492	0.310796	0.21774	0.107402	0.053217	0.252793	0.802078	0.881488	1.11225	0.171384	0.0508944	0.225656
CL218.1	0.320395	0.284324	0.189295	0.0461312	0.0413638	0.267377	0.895418	1.05302	1.29545	0.15946	0.0542309	0.249289
CL220.3	0.260661	1.12208	0.225465	0.0630084	0.0669694	0.0643764	0.693353	0.812183	1.0081	0.526992	0.446096	0.294025
CL221.1	0.239207	0.300903	0.230706	0.0774158	0.0503099	0.246206	0.723939	0.846514	1.08543	0.179425	0.0450204	0.275676
CL444.2	0.35539	0.307319	0.241622	0.256011	0.147911	0.259498	0.622401	1.11752	1.32293	0.340774	0.084413	0.34165
CL446.2	0.274792	0.939917	0.265603	0.250005	0.146907	0.122049	0.573754	0.737663	0.877471	0.597586	0.268051	0.267315
CL447.3	0.24324	0.347818	0.251343	0.262758	0.13017	0.220683	0.604063	0.940753	1.1494	0.34209	0.137955	0.282639
CL448.1	0.215181	0.441561	0.311185	0.315869	0.129176	0.193708	0.501047	0.708924	1.03769	0.415179	0.0835871	0.375578
CL449.1	0.236488	0.913456	0.308609	0.313042	0.135048	0.132772	0.512049	0.537901	0.763675	0.547513	0.125218	0.28422
CL450.1	0.233911	0.373214	0.279932	0.303836	0.163413	0.373867	0.705874	0.80173	1.02866	0.260371	0.111794	0.280371
CL451.4	0.212099	0.384792	0.314306	0.303484	0.164318	0.358896	0.586302	0.821328	0.983265	0.343061	0.172851	0.319019
CL467.2	0.245897	0.938022	0.296103	0.324565	0.15949	0.050481	0.358354	0.6929	0.8598	0.525337	0.260059	0.311095
CL471.2	0.359094	0.305264	0.233162	0.243421	0.146691	0.410894	0.887545	1.11138	1.32268	0.221982	0.0620042	0.216892
CL601.1	0.398051	0.43343	0.332422	0.122646	0.130699	0.35516	0.662561	0.746886	0.817017	0.407664	0.112617	0.350572
CL604.1	0.369649	1.00342	0.35921	0.21241	0.161077	0.164579	0.705329	0.76128	0.846126	0.851531	0.142757	0.305802
CL605.1	0.506819	0.51633	0.392522	0.189811	0.133628	0.221236	0.574082	0.616511	0.67539	0.48488	0.124115	0.409982
CL606.1	0.429628	0.558666	0.357267	0.604412	0.162324	0.231101	0.643044	0.541283	0.816019	0.432569	0.129417	0.360504
CL607.1	0.355725	1.03264	0.339314	0.17279	0.132491	0.16485	0.414053	0.433795	0.519923	0.527308	0.145503	0.525065
CL608.1	0.389011	0.536736	0.364798	0.131838	0.192355	0.332396	0.665643	0.559482	0.841467	0.444726	0.0580274	0.274122
CL609.1	0.437236	0.605416	0.390323	0.213339	0.185528	0.275643	0.537793	0.513044	0.688975	0.501359	0.0552146	0.381857
CL610.1	0.399593	0.994589	0.360689	0.15217	0.110632	0.145658	0.52033	0.449505	0.657405	0.574822	0.0627171	0.462637
CL611.1	0.548476	0.498339	0.393608	0.194152	0.163989	0.273547	0.621964	0.579358	0.708395	0.453515	0.111513	0.388167
Cl619.1	0.373528	0.539611	0.400949	0.231699	0.159441	0.259735	0.595339	0.673398	0.764013	0.49095	0.134795	0.392942
CL620.1	0.560678	1.05577	0.363482	0.119493	0.125506	0.146165	0.670137	0.666747	0.811522	0.751028	0.216268	0.340246
CL621.1	0.354217	0.388062	0.311926	0.173262	0.112154	0.332011	1.07622	0.765918	0.757029	0.215193	0.031151	0.188067
CL701.1	0.350953	0.261431	0.165627	0.0584169	0.056972	0.409956	0.962999	1.22183	1.51039	0.136352	0.0859716	0.256187
CL702.1	0.280289	1.10896	0.196867	0.0724391	0.0604069	0.0676187	0.719271	0.874687	1.04465	0.600335	0.349602	0.25947
CL703.2	0.273684	0.282596	0.195155	0.0638338	0.0471703	0.332036	0.926679	1.07948	1.31729	0.158568	0.106678	0.246269
CL704.2	0.292773	0.274059	0.187042	0.0498534	0.054259	0.354424	0.95275	1.11749	1.34531	0.154648	0.0983779	0.249297
CL705.1	0.295638	1.11664	0.202114	0.065745	0.0518979	0.0765768	0.658706	0.807529	1.07502	0.612333	0.308997	0.299677
CL706.2	0.302669	0.242209	0.163916	0.0782508	0.0594926	0.30852	0.996179	1.23764	1.53635	0.148851	0.0432774	0.204023
CL710.1	0.423673	0.503515	0.348577	0.157705	0.83504	0.303732	0.593394	0.589601	0.901647	0.498978	0.115832	0.387622
CL711.2	0.439022	1.73266	0.119577	0.0276144	0.0551287	0.0454455	0.856779	0.943995	1.43125	0.883914	0.209694	0.2295
CL801.1	0.310981	0.28687	0.207341	0.237602	0.120219	0.254411	0.49235	1.23887	1.4656	0.395531	0.156643	0.479617
CL803.1	0.241946	0.335677	0.282406	0.274026	0.144687	0.3008	0.796508	0.884486	1.07597	0.264226	0.0316377	0.245538
CL804.1	0.224008	0.908716	0.297225	0.275375	0.147321	0.0998136	0.504054	0.71911	0.8486	0.583727	0.216638	0.327361
CL807.1	0.268099	0.37135	0.280143	0.315293	0.143641	0.270082	0.736197	0.842305	1.11076	0.283966	0.101159	0.31651
CL810.1	0.224647	0.389747	0.311721	0.317139	0.137399	0.277799	0.664575	0.813294	0.986084	0.307477	0.130971	0.363723
CL812.1	0.25627	0.960164	0.292945	0.297346	0.169787	0.190172	0.560061	0.71584	0.856914	0.553133	0.121154	0.265792
CL813.1	0.547599	0.192649	0.111981	0.035837	0.0905111	0.823963	1.76884	2.0496	2.53274	0.141996	0.0482853	0.137701
CL814.1	0.538652	0.156478	0.0855344	0.0322402	0.0677041	1.41942	2.06598	2.78498	3.42955	0.122805	0.0294237	0.107712
CL815.1	0.50148	1.9645	0.443439	0.166208	0.172689	0.147962	0.427798	0.481219	0.67254	0.55148	0.107309	0.39764
CL816.1	0.381035	0.125433	0.0838393	0.0244619	0.0274011	0.784831	2.16247	2.17367	3.21113	0.109623	0.0172	0.104393
CL817.1	0.351503	0.168166	0.123315	0.0367464	0.0380753	0.467839	1.46349	1.58184	2.09133	0.16616	0.0508102	0.162013
CL821.1	0.599439	1.57393	0.264107	0.0885487	0.272865	0.163658	0.498749	0.55576	0.702545	0.579774	0.351316	0.434673
CL824.1	0.474374	0.171429	0.111007	0.034286	0.0577086	0.482646	1.69016	1.77356	2.28168	0.141878	0.0181054	0.135163
CL902.1	0.629997	0.18221	0.112427	0.0387177	0.0776878	0.960935	1.69163	1.90545	2.37347	0.130642	0.0368799	0.109497
CL903.1	0.669858	1.31369	0.259922	0.188168	0.204127	0.027581	0.680341	0.932295	0.847457	0.688015	0.215605	0.256108
CL904.1	0.543935	0.164738	0.0812521	0.0448713	0.0431485	1.57356	2.63367	3.0936	3.6456	0.0905895	0.0132856	0.0886948
CL905.1	0.595756	0.117886	0.0628123	0.0328208	0.0360595	1.52719	3.3257	3.87035	4.20642	0.0600973	0.0185638	0.0620639
CL906.1	0.559039	1.65033	0.356411	0.127927	0.144822	0.110153	0.626353	0.700251	0.804342	0.636274	0.193895	0.321771
CL907.1	0.529399	0.120855	0.0681338	0.0315866	0.0759835	0.857102	2.36454	3.19294	3.81226	0.0838253	0.0327846	0.0970589
CL909.1	0.562461	0.144767	0.073749	0.0460633	0.0510985	0.701907	2.30715	3.0114	3.62236	0.0837747	0.0334304	0.0974456
CL910.1	0.5546	1.41821	0.467546	0.128578	0.340101	0.106811	0.480569	0.583009	0.706416	0.551894	0.0988349	0.411467
CL915.1	1.16293	0.205336	0.167104	0.0539355	0.0724444	0.403551	1.04864	1.53831	1.39892	0.235382	0.0359584	0.195583
CL916.1	1.10624	0.250393	0.230539	0.0720554	0.0679162	0.296009	0.760606	1.09803	1.11879	0.270338	0.0393222	0.262955

## Sheet: Table S1d
Table S1d. Kinetic parameter (µmax) of S. eubayauns in stressor media
Strain	Caffeine	CuSO4	DTT	G418	H2O2	KCl	NaCl	p_Coumaric acid	SDS
CL1001.1	0.535247	0.535247	0.965957	0.304259	0.46025	0.530974	0.295477	0.447177	0.244483
CL1002.1	0.696338	0.696338	1.04048	0.0993148	0.142284	0.154626	0.984991	1.37092	0.108997
CL1003.1	0.539452	0.539452	1.03094	0.0955242	0.131923	0.12669	1.07143	1.5489	0.0772112
CL1004.1	0.500156	0.500156	0.965346	0.199872	0.305808	0.263063	0.434193	0.677294	0.299686
CL1005.1	0.586366	0.586366	0.987888	0.0811665	0.137862	0.150176	0.752783	1.15435	0.120769
CL1006.1	0.494818	0.494818	0.923362	0.0857664	0.119793	0.124445	0.657819	1.11798	0.0817556
CL1007.1	0.51702	0.51702	0.582234	0.170807	0.176561	0.161299	0.685967	0.689617	0.433189
CL1008.1	0.607262	0.607262	0.853305	0.118257	0.158524	0.136078	0.631476	0.718144	0.120936
CL1009.1	0.620639	0.620639	1.06244	0.0960996	0.119694	0.103476	0.710344	0.80814	0.114653
CL1010.1	0.430804	0.430804	0.867511	0.477679	0.519646	0.465502	0.231169	0.27386	0.16277
CL1101.1	1.00219	1.107	0.751034	0.312119	0.35141	0.337814	0.824612	0.80511	0.303515
CL1104.1	1.2493	1.00344	0.790235	0.221329	0.309104	0.323187	0.675405	0.634606	0.360792
CL1106.1	1.04619	1.31463	0.7137	0.28789	0.339456	0.369366	0.774678	0.605283	0.713761
CL1108.1	0.985103	1.07288	0.543177	0.35892	0.374769	0.462272	0.693146	0.495582	0.37105
CL1109.1	1.01393	1.16074	0.536415	0.370629	0.382904	0.442593	0.684579	0.528225	0.352498
CL1110.1	1.16515	1.39599	0.679648	0.350685	0.375183	0.369271	0.646062	0.635268	0.664612
CL1111.1	1.10972	1.24148	0.733504	0.264708	0.338065	0.368831	0.915986	0.677742	0.291085
CL1112.1	1.29889	1.61869	0.958944	0.233107	0.248433	0.273151	1.17219	1.01113	0.223487
CL204.3	0.533602	0.404436	0.965554	0.149947	0.226064	0.264932	0.87271	1.18385	0.93505
CL210.1	0.547468	0.394655	0.918564	0.151416	0.246792	0.267874	0.918994	1.43311	0.241794
CL211.3	0.570064	0.418933	0.911114	0.168677	0.247861	0.270396	1.02318	1.37726	0.238343
CL215.1	0.607639	0.371311	0.913446	0.214998	0.137758	0.322209	1.43291	2.03418	1.54069
CL216.1	0.554123	0.408057	0.850825	0.181439	0.247968	0.271044	0.883078	1.28229	0.247021
CL218.1	0.550588	0.380767	0.951749	0.17164	0.200843	0.253227	1.04292	1.3924	0.237101
CL220.3	0.566683	0.445246	0.882703	0.188256	0.237467	0.243679	0.791948	1.12535	0.825386
CL221.1	0.430956	0.372642	0.878125	0.192896	0.110084	0.275842	0.928964	1.2089	0.285341
CL444.2	0.570392	0.930571	0.962299	0.290525	0.298267	0.320978	1.32001	1.15706	0.495755
CL446.2	0.594963	0.866519	0.824884	0.331446	0.355496	0.424262	0.976838	0.769079	0.834019
CL447.3	0.641132	0.903986	0.81006	0.317451	0.331857	0.296155	1.30157	1.02312	0.453673
CL448.1	0.660687	0.979284	0.700157	0.36543	0.400862	0.507971	0.90599	0.822208	0.546765
CL449.1	0.632682	0.959811	0.725049	0.368916	0.390021	0.33081	0.820531	0.685816	0.741194
CL450.1	0.587007	0.897646	0.72549	0.354719	0.384946	0.343708	0.920158	0.919314	0.397492
CL451.4	0.592661	0.95743	0.77459	0.363965	0.384489	0.356708	0.900102	0.89697	0.500373
CL467.2	0.583862	0.878813	0.791354	0.356514	0.375388	0.361369	0.792731	0.751566	0.792013
CL471.2	0.555962	0.899675	0.926592	0.289975	0.300534	0.316685	1.3173	1.15237	0.332304
CL601.1	0.476474	0.981586	0.727697	0.382536	0.430696	0.35159	0.84257	0.8374	0.450788
CL604.1	0.485951	0.916901	0.713314	0.410157	0.338049	0.364184	0.90173	0.86547	0.881066
CL605.1	0.532302	0.757345	0.601532	0.485576	0.353474	0.428754	0.65774	0.744136	0.482038
CL606.1	0.470273	0.80458	0.535969	0.503843	0.44233	0.488478	0.763549	0.75586	0.465775
CL607.1	0.49178	0.85824	0.526358	0.52958	0.511676	0.464932	0.531396	0.544776	0.506901
CL608.1	0.500277	0.785183	0.584086	0.474056	0.441334	0.567456	0.686448	0.759022	0.406258
CL609.1	0.460317	0.586708	0.497858	0.5589	0.533946	0.500075	0.554076	0.712878	0.508586
CL610.1	0.521543	0.716194	0.598309	0.450013	0.49483	0.356846	0.518274	0.54412	0.541373
CL611.1	0.478701	0.812034	0.625167	0.463133	0.43248	0.339214	0.719427	0.735593	0.439865
Cl619.1	0.474066	0.507349	0.581513	0.486409	0.504677	0.463391	0.762034	0.705459	0.491364
CL620.1	0.507859	1.08188	0.622077	0.441748	0.347178	0.405875	0.763905	0.791529	0.919609
CL621.1	0.217995	0.40854	0.609509	0.317419	0.343952	0.375753	0.638411	0.620242	0.164499
CL701.1	0.461788	0.643481	1.01405	0.149753	0.207556	0.232046	1.28523	1.58036	0.193389
CL702.1	0.493316	0.456354	0.979785	0.213524	0.238884	0.283894	0.950109	1.12587	0.91643
CL703.2	0.541486	0.395063	0.958437	0.168659	0.214963	0.258943	1.13176	1.39064	0.236528
CL704.2	0.578205	0.407711	0.978716	0.167992	0.230802	0.242207	1.14308	1.41077	0.232406
CL705.1	0.540495	0.408628	0.919151	0.188373	0.242761	0.199176	0.857399	1.07198	0.851244
CL706.2	0.614518	0.462041	1.0383	0.16216	0.190666	0.223374	1.27176	1.63507	0.213472
CL710.1	0.485481	0.813563	0.633283	0.476212	0.365604	0.438763	0.779351	0.865166	0.477519
CL711.2	0.890356	0.667558	1.40712	0.1212	0.169612	0.160597	1.02618	1.1546	1.15695
CL801.1	0.612469	0.943734	0.970212	0.265717	0.280331	0.280267	1.40493	1.24337	0.58983
CL803.1	0.636535	0.954528	0.847746	0.325568	0.332852	0.324384	1.0404	0.977313	0.384864
CL804.1	0.633147	0.954798	0.810003	0.340875	0.352567	0.330861	0.796836	0.783139	0.878744
CL807.1	0.641424	0.931182	0.771111	0.330431	0.355867	0.289506	0.94311	0.909532	0.365721
CL810.1	0.637255	0.980249	0.75927	0.366744	0.372083	0.356371	0.903002	0.893293	0.450569
CL812.1	0.644371	0.954919	0.805076	0.344229	0.358436	0.333459	0.74595	0.773168	0.85763
CL813.1	1.29908	0.987273	1.4066	0.118634	0.121271	0.156348	2.00439	1.99312	0.0968111
CL814.1	1.24786	0.729115	1.62962	0.0754124	0.0714516	0.135236	2.32985	2.51266	0.0950057
CL815.1	1.1838	1.05273	1.61997	0.368259	0.425923	0.527771	0.441445	0.506205	0.44958
CL816.1	1.16581	1.00948	2.00927	0.045211	0.0688556	0.0900292	1.90573	2.51481	0.0769493
CL817.1	0.995238	1.09309	1.57185	0.0682991	0.117195	0.0890303	1.36012	1.68268	0.11593
CL821.1	1.53349	1.09371	1.66696	0.297972	0.33152	0.301144	0.591688	0.522365	0.424677
CL824.1	1.18812	0.579092	1.48375	0.0774334	0.0695709	0.123775	1.90789	1.90256	0.0925728
CL902.1	1.17723	0.903395	1.43621	0.0884329	0.104029	0.147201	1.73175	2.01528	0.100193
CL903.1	1.18515	0.787477	1.54599	0.381952	0.270149	0.428589	0.713258	0.745035	0.678328
CL904.1	1.12834	0.847281	1.66342	0.079735	0.0854664	0.121742	2.3301	2.30481	0.0696907
CL905.1	1.87805	0.904518	1.98415	0.130049	0.0708421	0.103258	4.64636	2.88411	0.0492561
CL906.1	1.7406	0.922602	1.86413	0.471567	0.322574	0.454337	0.775584	0.514368	0.485733
CL907.1	1.42079	0.753407	1.9318	0.124221	0.0625979	0.091392	3.34703	2.34197	0.0555871
CL909.1	1.70254	1.4259	1.71005	0.0792377	0.126516	0.100834	3.50275	2.03751	0.0546136
CL910.1	1.35617	0.910487	1.59718	0.753276	0.396771	0.406505	0.593187	0.397664	0.394854
CL915.1	0.597874	0.597874	1.14816	0.117105	0.137733	0.255891	0.946357	1.20473	0.144328
CL916.1	0.589833	0.589833	0.863048	0.109411	0.158578	0.187401	0.593654	0.813409	0.146669

## Sheet: Table S1e
Table S1e. Kinetic parameter (µmax) of S. eubayanus in ethanol and methanol
Strain	Ethanol 8%	Methanol 8%
CL1001.1	0.276621	0.173507
CL1002.1	0.289398	0.311727
CL1003.1	0.300375	0.418328
CL1004.1	0.326264	0.0946206
CL1005.1	0.308073	0.297369
CL1006.1	0.351559	0.357679
CL1007.1	0.264732	0.0527165
CL1008.1	0.291209	0.183444
CL1009.1	0.308284	0.238325
CL1010.1	0.307786	0.145542
CL1101.1	1.13626	0.634893
CL1104.1	1.33204	0.638088
CL1106.1	1.24957	0.23098
CL1108.1	0.931689	0.426337
CL1109.1	1.1602	0.420484
CL1110.1	1.03466	0.232722
CL1111.1	1.19452	0.789692
CL1112.1	1.33426	1.21889
CL204.3	0.755873	0.226064
CL210.1	0.664166	1.15998
CL211.3	0.603755	1.11653
CL215.1	0.644389	0.137758
CL216.1	0.559561	0.968941
CL218.1	0.671104	1.00981
CL220.3	0.709264	0.237467
CL221.1	0.684819	0.419008
CL444.2	0.830935	1.16597
CL446.2	0.816955	0.314812
CL447.3	0.831398	0.959797
CL448.1	0.786933	0.769941
CL449.1	0.841249	0.352845
CL450.1	0.806522	0.876054
CL451.4	0.815887	0.873529
CL467.2	0.853273	0.333722
CL471.2	0.839436	1.15448
CL601.1	0.915205	0.729164
CL604.1	0.924944	0.404709
CL605.1	0.798757	0.636011
CL606.1	0.806367	0.559511
CL607.1	1.43131	0.374489
CL608.1	0.748466	0.463147
CL609.1	0.670892	0.592431
CL610.1	0.759691	0.346349
CL611.1	0.851177	0.682999
Cl619.1	0.768738	0.586458
CL620.1	0.899427	0.410702
CL621.1	0.715838	0.627742
CL701.1	0.815696	1.27076
CL702.1	0.604216	0.238884
CL703.2	0.661357	1.05572
CL704.2	0.656006	1.20769
CL705.1	0.639546	0.242761
CL706.2	0.733025	1.20774
CL710.1	0.787227	0.771625
CL711.2	0.986676	0.169612
CL801.1	0.867852	1.10126
CL803.1	0.815477	0.788268
CL804.1	0.79716	0.286489
CL807.1	0.828248	0.792839
CL810.1	0.823653	0.758439
CL812.1	0.82445	0.316911
CL813.1	0.760964	1.54352
CL814.1	0.691653	1.69539
CL815.1	0.728541	0.41552
CL816.1	0.821473	1.71865
CL817.1	0.656612	1.1103
CL821.1	0.868757	0.295095
CL824.1	0.666629	1.22763
CL902.1	0.760214	1.36156
CL903.1	0.775092	0.314036
CL904.1	0.85784	1.55296
CL905.1	0.750472	1.86112
CL906.1	0.771006	0.280656
CL907.1	0.638707	1.47892
CL909.1	0.823001	1.49099
CL910.1	0.802247	0.341392
CL915.1	0.373008	0.404199
CL916.1	0.330216	0.264227
