# Supplementary material for: Phenotypic diversity and hybridization of wild Saccharomyces for improving bioethanol production
Source: Research Square preprint supplement (doi:10.21203/rs.3.rs-8138800/v1), 2026-01-05
Supplement: Supplementary file 3 [file 32d97eef8372b57766b5171d.pdf]

## SMB fermentation

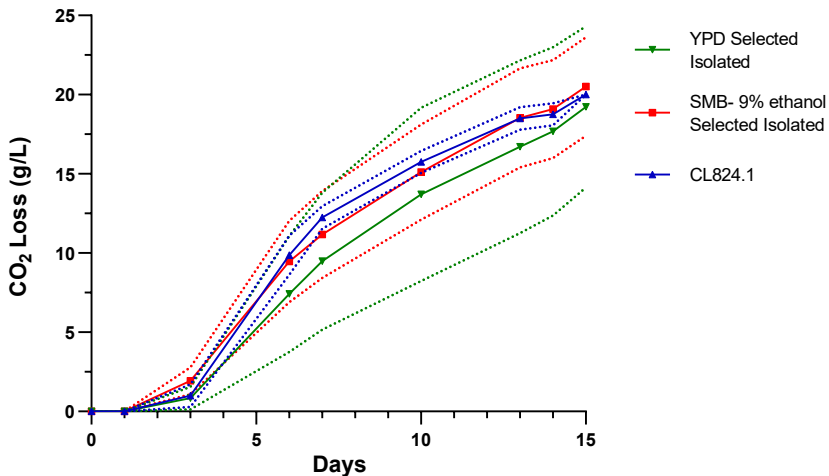

Figure S6. **Fermentation kinetics of hybrids.** The SMB medium was fermented using hybrids and the parental CL824.1. The CO<sub>2</sub> loss was evaluated over time. The dot lines represent the maximum and minimum performance of the hybrids. The continuous line represents the mean of the respective group
