# Supplementary material for: Phenotypic diversity and hybridization of wild Saccharomyces for improving bioethanol production
Source: Research Square preprint supplement (doi:10.21203/rs.3.rs-8138800/v1), 2026-01-05
Supplement: Supplementary file 5 [file 87a1e4a19c7bdfbf750ad655.pdf]

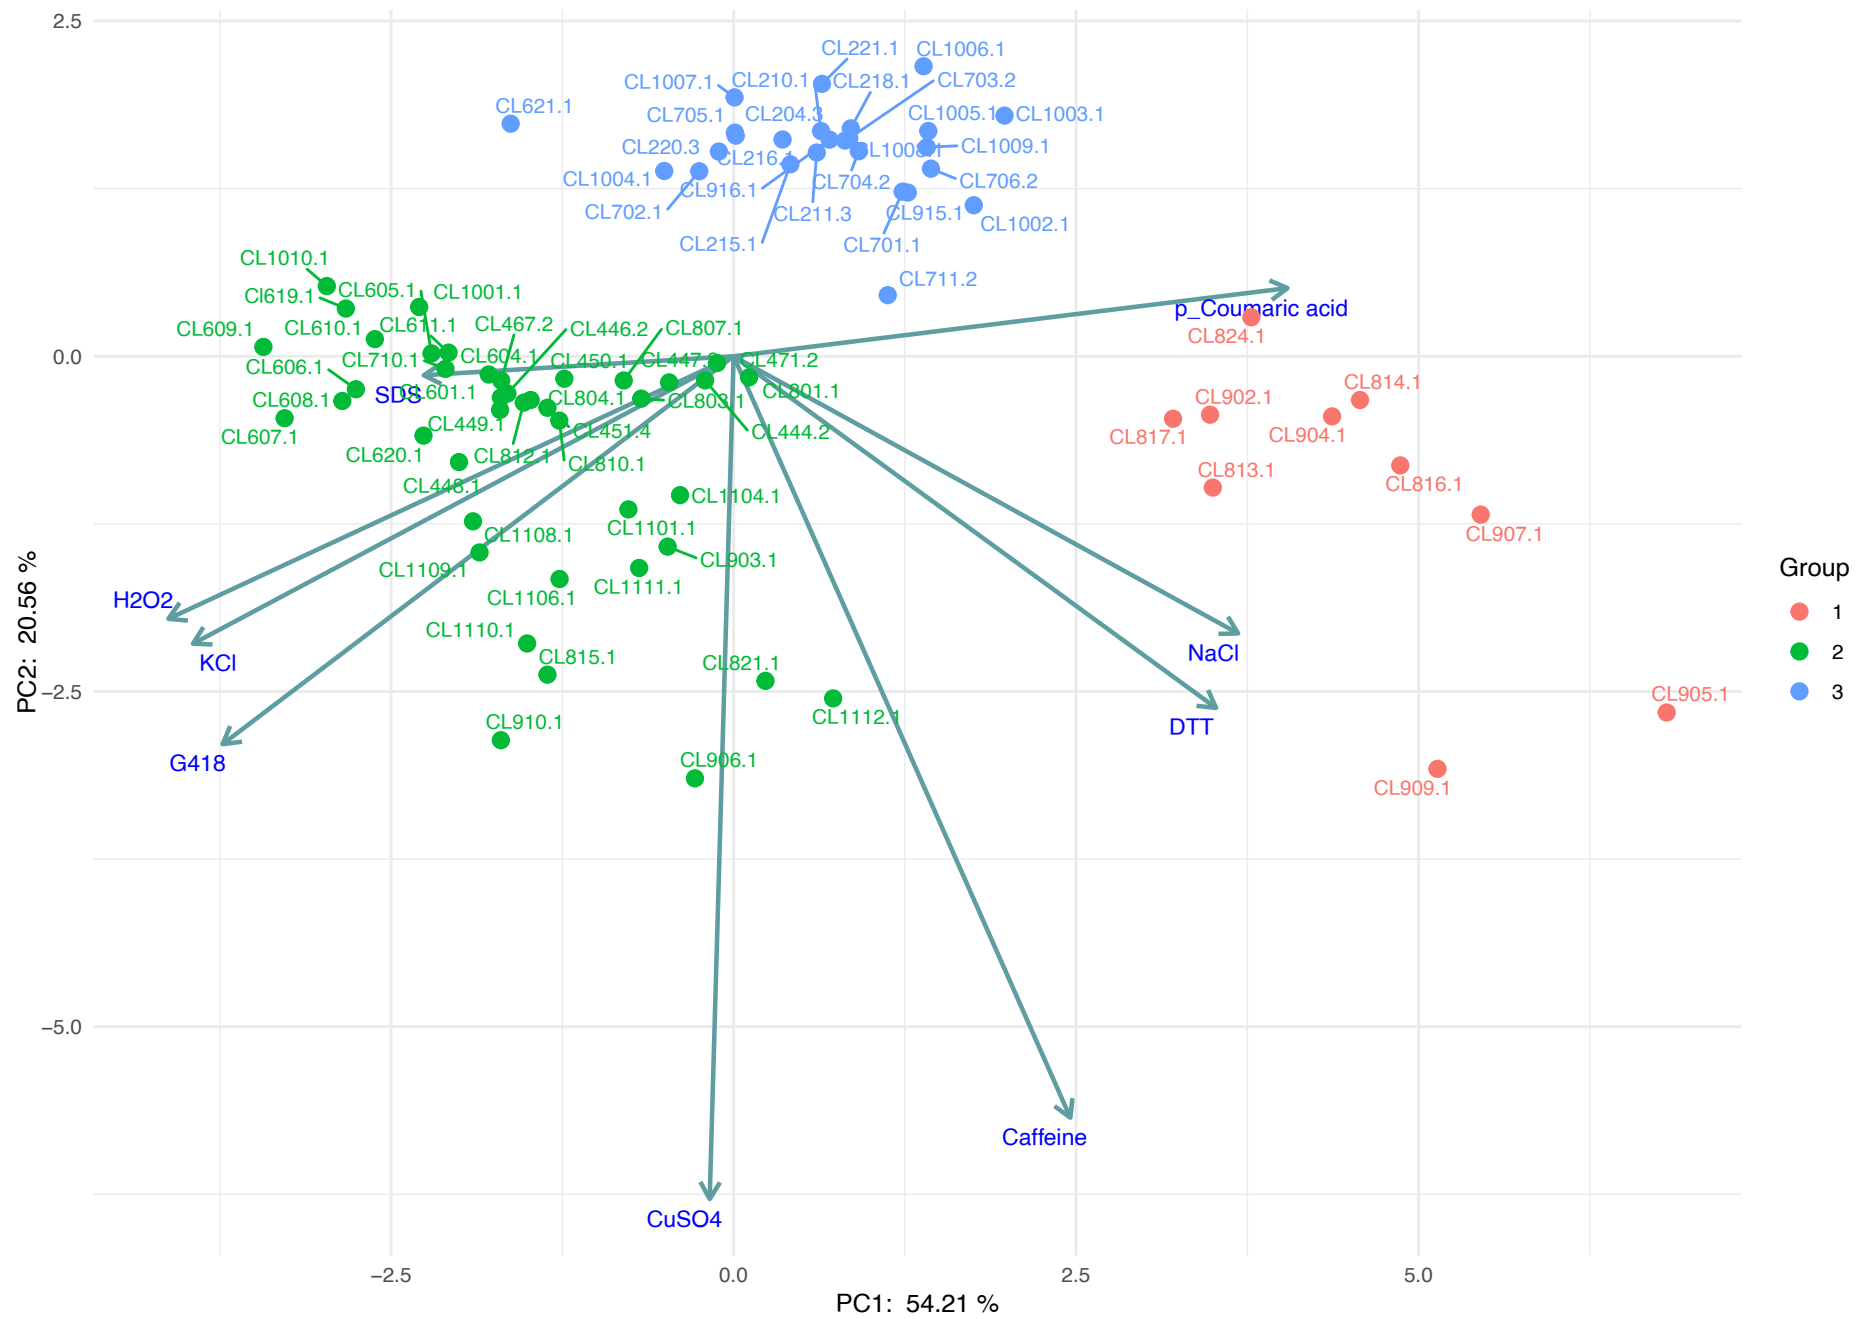

Figure S2. PCA analysis of the growth rate of strains on different stressors. The strains were cultured in YNB- 2% glucose medium supplemented with respective stressor compounds, and the OD600 was measured over time. A PCA analysis was performed, and the estimated optimal group number was determined by fviz\_nbclust.
